# Supplementary material for: An integrated approach towards the fabrication of highly efficient and long-term stable perovskite nanowire solar cells
Source: Royal Society of Chemistry journal article supplement (doi:10.1039/c7ta07968k), 2017-01-01
Supplement: c7ta07968k1.pdf [file c7ta07968k1.pdf]

## Electronic Supplementary Information

# An Integrated Approach towards Highly-Efficient and Long-Term Stable Perovskite Nanowires Solar Cells

Chih-Yu Chang,<sup>\*a</sup> Bo-Chou Tsai,<sup>a</sup> Min-Zhen Lin,<sup>a</sup> Yu-Ching Huang<sup>b</sup> and Cheng-Si Tsao<sup>b,c</sup>

<sup>a</sup> Department of Materials Science and Engineering, Feng Chia University, Taichung, Taiwan 40724, R.O.C. (\*E-mail: [changcyu@fcu.edu.tw](mailto:changcyu@fcu.edu.tw))

<sup>b</sup> Institute of Nuclear Energy Research, Longtan, Taoyuan, Taiwan 32546, R.O.C.

<sup>c</sup> Department of Materials Science and Engineering, National Taiwan University, Taipei, Taiwan 10617, R.O.C.

**Table S1** Summary of the series and shunt resistances of the devices.

| Device | Shunt resistance [ $\text{K}\Omega \text{ cm}^2$ ] | Series resistance [ $\Omega \text{ cm}^2$ ] |
|--------|----------------------------------------------------|---------------------------------------------|
| A      | 144.9                                              | 213.2                                       |
| C      | 106                                                | 1005.2                                      |
| D      | 117.6                                              | 48.7                                        |

**Table S2** Comparison of the device characteristics of perovskite NWs solar cells previously reported as well as the present work.

| Source      | $V_{oc}$ [volt] | $J_{sc}$ [ $\text{mA cm}^{-2}$ ] | FF [%] | PCE [%] |
|-------------|-----------------|----------------------------------|--------|---------|
| Reference 1 | 1.05            | 19.12                            | 72.10  | 14.71   |
| Reference 2 | 1.12            | 22.47                            | 70.01  | 17.62   |
| This work   | 1.01            | 23.39                            | 79.74  | 18.83   |

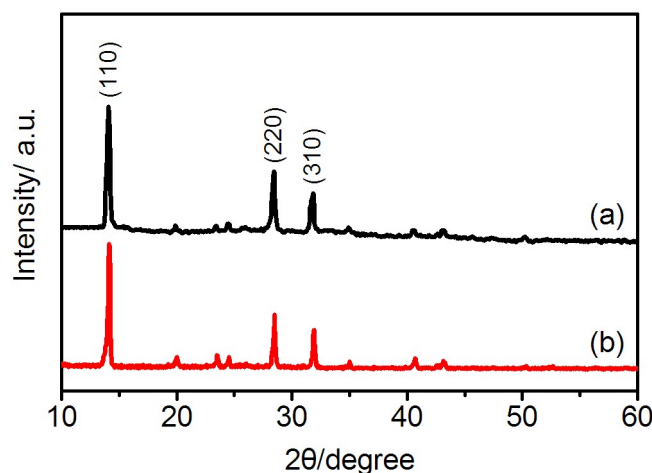

**Fig. S1** X-ray diffraction patterns of: (a) MAPbI<sub>3</sub> compact film and (b) MAPbI<sub>3</sub> NWs.

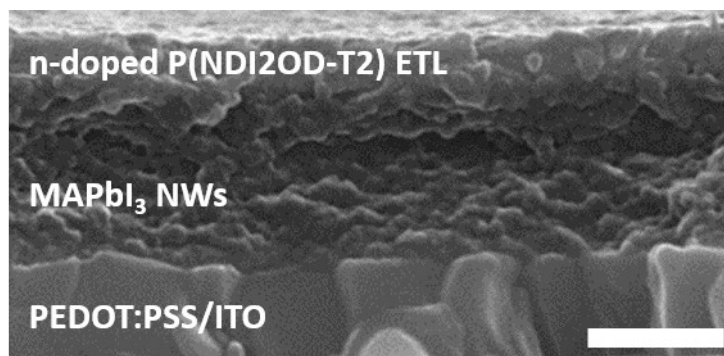

**Fig. S2** Cross-sectional SEM image of MAPb<sub>3</sub> NWs coated with 10 mol% N-DPBI-doped P(NDI2OD-T2) layer (scale bar = 400 nm).

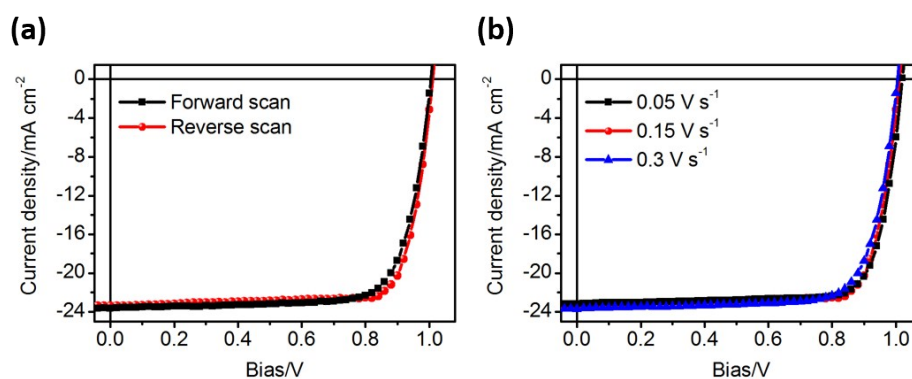

**Fig. S3** *J*-*V* characteristics of device D measured under simulated AM 1.5G solar irradiation (intensity = 100 mW cm<sup>-2</sup>) with: (a) different sweep directions (scan rate = 0.15 V s<sup>-1</sup>) and (b) different voltage sweep rates.

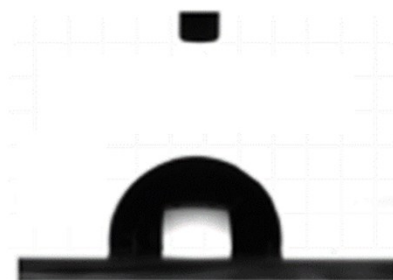

**Fig. S4** Image of water droplet on N-DPBI-doped P(NDI2OD-T2) ETL.

## References

1. J.-H. Im, J. Luo, M. Franckevičius, N. Pellet, P. Gao, T. Moehl, S. M. Zakeeruddin, M. K. Nazeeruddin, M. Grätzel and N.-G. Park, *Nano Lett.*, 2015, **15**, 2120-2126.
2. S. Wanga, S. Yana, M. Wang, L. Chang, J. Wang and Z. Wang, *Sol. Energy Mater. Sol. Cells*, 2017, **167**, 173-177.
